# Supplementary material
Source: bioRxiv or medRxiv preprint supplement (https://www.biorxiv.org/highwire/filestream/123393/field_highwire_adjunct_files/0/408492-1.pdf)
Supplement: Supplementary file [file 408492-1.pdf]

Supplementary Table 1. Overview of clinical cases integrated in the study. This table includes healthy family members, the type of genetic data we used, and the results highlighted.

| case_id            | institution | affected | status | sex | age | disease_category                | RIN | read_length | avg_library_size | variant_data | candidates before RNA-seq                                               | candidates after RNA-seq                   | type of expression event highlighted    |
|--------------------|-------------|----------|--------|-----|-----|---------------------------------|-----|-------------|------------------|--------------|-------------------------------------------------------------------------|--------------------------------------------|-----------------------------------------|
| s1                 | CHEO        | Case     | F      |     | 21  | Neurology                       |     | 8.4         | 151              | 333 exome    |                                                                         |                                            | -                                       |
| 1 s2               | CHEO        | Case     | F      |     | 24  | Neurology                       |     | 9.1         | 151              | 333 exome    | solved                                                                  | no                                         | -                                       |
| 2 s3               | CHEO        | Case     | M      |     | 50  | Other                           |     | 9.2         | 151              | 326 exome    | no strong candidates                                                    | no                                         | -                                       |
| 3 s4               | CHEO        | Case     | F      |     | 12  | Neurology                       |     | 9.3         | 151              | 333 exome    | no strong candidates                                                    | no                                         | -                                       |
| 4 s5               | CHEO        | Case     | M      |     | 16  | Neurology                       |     | 9.3         | 151              | 328 exome    | no strong candidates                                                    | no                                         | -                                       |
| 5 s6               | CHEO        | Case     | F      |     | 15  | Neurology                       |     | 9.1         | 151              | 338 exome    | no strong candidates                                                    | no                                         | -                                       |
| 6 s7               | CHEO        | Case     | M      |     | 5   | Neurology                       |     | 8.7         | 151              | 340 exome    | no strong candidates                                                    | no                                         | -                                       |
| s8                 | CHEO        | Case     | M      |     | 55  | Neurology                       |     | 9.4         | 151              | 335 exome    |                                                                         |                                            | -                                       |
| 7 s9               | CHEO        | Case     | NA     |     | 55  | Neurology                       |     | 9.4         | 151              | 342 exome    | no strong candidates                                                    | no                                         | -                                       |
| s10                | CGS         | Control  | F      |     | 48  | NA                              |     | 8.2         | 75               | 351 exome    |                                                                         |                                            | -                                       |
| s11                | CGS         | Control  | M      |     | 49  | NA                              |     | 8.7         | 75               | 347 exome    |                                                                         |                                            | -                                       |
| s12                | CGS         | Case     | M      |     | 16  | Hematology                      |     | 8.5         | 75               | 355 exome    |                                                                         |                                            | -                                       |
| 8 s13              | CGS         | Case     | F      |     | 14  | Hematology                      |     | 8.4         | 75               | 355 exome    | candidates                                                              | no                                         | -                                       |
| 9 s14              | CGS         | Case     | M      |     | 61  | Hematology                      | NA  |             | 75               | 352 genome   | candidates                                                              | no                                         | -                                       |
| s15                | CGS         | Control  | M      |     | 30  | NA                              |     | 8.3         | 75               | 354 genome   |                                                                         |                                            | -                                       |
| s16                | CGS         | Control  | F      |     | 26  | NA                              |     | 7.7         | 75               | 357 genome   |                                                                         |                                            | -                                       |
| s17                | CGS         | Case     | F      |     | 7   | Hematology                      | NA  |             | 75               | 350 genome   |                                                                         |                                            | -                                       |
| s18                | CGS         | Case     | F      |     | 5   | Hematology                      |     | 8.2         | 75               | 350 genome   |                                                                         |                                            | -                                       |
| 10 s19             | CGS         | Case     | F      |     | 3   | Hematology                      |     | 8           | 75               | 349 genome   | candidates                                                              | no                                         | -                                       |
| 11 s20             | CHEO        | Case     | F      |     | 15  | Musculoskeletal and orthopedics |     | 8.8         | 75               | 354 none     | candidates                                                              | no                                         | -                                       |
| s21                | CHEO        | Case     | M      | NA  |     | Gynecology                      |     | 9.2         | 75               | 348 exome    |                                                                         |                                            | -                                       |
| s22                | CHEO        | Case     | M      | NA  |     | Gynecology                      |     | 8.6         | 75               | 349 none     |                                                                         |                                            | -                                       |
| 12 s23             | CHEO        | Case     | M      | NA  |     | Gynecology                      |     | 9           | 75               | 348 none     | no strong candidates                                                    | candidate not directly linked to phenotype | splicing outlier                        |
| 13 s24             | CHEO        | Case     | F      |     | 6   | Neurology                       |     | 7.8         | 75               | 352 none     | * this case was solved with the help of RNA-seq in Kerrohan et. Al 2017 | solved                                     | splicing outlier                        |
| s25                | CHEO        | Case     | F      |     | 28  | Neurology                       |     | 8.3         | 75               | 351 none     |                                                                         |                                            | -                                       |
| 14 s26             | CHEO        | Control  | F      | NA  |     | NA                              |     | 7.3         | 75               | 365 none     | no strong candidates                                                    | candidate linked to phenotype              | splicing outlier                        |
| 15 s27             | CHEO        | Case     | M      |     | 9   | Musculoskeletal and orthopedics |     | 8           | 75               | 359 none     | no strong candidates                                                    | no                                         | -                                       |
| 16 s28             | CHEO        | Case     | M      |     | 13  | Neurology                       |     | 8.8         | 75               | 358 none     | candidates                                                              | no                                         | -                                       |
| 17 s29             | CHEO        | Case     | F      |     | 9   | Neurology                       |     | 8.4         | 75               | 359 none     | solved                                                                  | no                                         | -                                       |
| 18 s30             | CGS         | Case     | M      |     | 54  | Ophthalmology                   | NA  |             | 75               | 340 genome   | no strong candidates                                                    | no                                         | -                                       |
| 19 s31             | CGS         | Case     | M      |     | 44  | Ophthalmology                   |     | 9           | 75               | 335 genome   | no strong candidates                                                    | candidate not directly linked to phenotype | splicing outlier                        |
| 20 s32             | CGS         | Case     | F      |     | 45  | Ophthalmology                   |     | 8.9         | 75               | 321 genome   | candidates                                                              | no                                         | -                                       |
| 21 s33             | CGS         | Case     | F      |     | 43  | Ophthalmology                   |     | 8.7         | 75               | 351 genome   | candidates                                                              | candidate not directly linked to phenotype | splicing outlier                        |
| 22 s34             | CGS         | Case     | F      |     | 40  | Ophthalmology                   | NA  |             | 75               | 329 genome   | candidates                                                              | no                                         | -                                       |
| 23 s35             | CGS         | Case     | F      |     | 19  | Ophthalmology                   |     | 9.1         | 75               | 348 genome   | no strong candidates                                                    | no                                         | -                                       |
| 24 s36             | UDN         | Case     | M      |     | 22  | Musculoskeletal and orthopedics |     | 9.1         | 75               | 338 genome   | candidates                                                              | candidate not directly linked to phenotype | splicing outlier                        |
| s37                | UDN         | Case     | M      |     | 14  | Neurology                       |     | 9.3         | 75               | 339 exome    |                                                                         |                                            | -                                       |
| s38                | UDN         | Control  | M      |     | 35  | NA                              |     | 8.9         | 75               | 326 exome    |                                                                         |                                            | -                                       |
| 25 s39             | UDN         | Control  | F      |     | 33  | NA                              |     | 8.8         | 75               | 323 exome    | no strong candidates                                                    | no                                         | -                                       |
| 26 s40             | UDN         | Case     | F      |     | 21  | Neurology                       |     | 8.8         | 75               | 341 exome    | solved                                                                  | no                                         | causal variant not impacting expression |
| 27 s41             | UDN         | Case     | M      |     | 55  | Cardiology                      |     | 8.4         | 75               | 341 exome    | no strong candidates                                                    | candidate linked to phenotype              | ASE loss of function variant            |
| 28 s42             | UDN         | Case     | F      |     | 12  | Neurology                       |     | 8.2         | 75               | 354 exome    | strong candidate gene                                                   | solved                                     | splicing outlier                        |
| 29 s43             | UDN         | Case     | F      |     | 57  | Infectious diseases             |     | 8.3         | 75               | 324 exome    | no strong candidates                                                    | no                                         | -                                       |
| s44                | UDN         | Control  | F      |     | 35  | NA                              |     | 7.8         | 151              | 571 genome   |                                                                         |                                            | -                                       |
| s45                | UDN         | Control  | M      |     | 35  | NA                              |     | 8.3         | 151              | 530 exome    |                                                                         |                                            | -                                       |
| 30 s46             | UDN         | Case     | F      |     | 5   | Neurology                       |     | 7.8         | 151              | 662 genome   | candidates                                                              | candidate linked to phenotype              | splicing outlier                        |
| s47                | UDN         | Case     | F      |     | 13  | Neurology                       |     | 8           | 151              | 521 genome   |                                                                         |                                            | -                                       |
| s48                | UDN         | Control  | F      |     | 50  | NA                              |     | 8.5         | 151              | 538 exome    |                                                                         |                                            | -                                       |
| s49                | UDN         | Control  | M      |     | 48  | NA                              |     | 8.3         | 151              | 541 exome    |                                                                         |                                            | -                                       |
| 31 s50             | UDN         | Case     | F      |     | 11  | Neurology                       |     | 8.4         | 151              | 578 exome    | solved                                                                  | solved                                     | under-expression outlier                |
| 32 s51             | UDN         | Case     | M      |     | 5   | Neurology                       |     | 8.8         | 151              | 482 exome    | solved                                                                  | no                                         | causal gene not expressed               |
| s52                | UDN         | Case     | M      |     | 5   | Other                           |     | 8.3         | 151              | 614 exome    |                                                                         |                                            | -                                       |
| s53                | UDN         | Control  | M      |     | 38  | NA                              |     | 8.1         | 151              | 561 exome    |                                                                         |                                            | -                                       |
| 33 s54             | UDN         | Control  | F      |     | 30  | NA                              |     | 8.5         | 151              | 540 exome    | strong candidate gene                                                   | solved                                     | under-expression outlier                |
| s55                | CGS         | Case     | F      |     | 5   | Neurology                       |     | 8.7         | 151              | 373 exome    |                                                                         |                                            | -                                       |
| 34 s56             | CGS         | Control  | F      |     | 40  | NA                              |     | 8.8         | 151              | 373 exome    | no strong candidates                                                    | candidate linked to phenotype              | splicing outlier                        |
| s57                | CGS         | Case     | F      |     | 54  | Other                           |     | 8.4         | 151              | 335 exome    |                                                                         |                                            | -                                       |
| 35 s58             | CGS         | Case     | F      |     | 47  | Other                           |     | 8.6         | 151              | 340 exome    | no strong candidates                                                    | no                                         | -                                       |
| 36 s59             | CGS         | Case     | F      |     | 10  | Neurology                       |     | 8.6         | 151              | 349 exome    | no strong candidates                                                    | candidate linked to phenotype              | splicing outlier                        |
| s60                | CGS         | Control  | F      |     | 80  | NA                              |     | 8.7         | 151              | 334 exome    |                                                                         |                                            | -                                       |
| s61                | CGS         | Case     | M      |     | 63  | Hematology                      |     | 8.7         | 151              | 345 exome    |                                                                         |                                            | -                                       |
| 37 s62             | CGS         | Control  | F      |     | 59  | NA                              |     | 8.8         | 151              | 340 exome    | no strong candidates                                                    | candidate linked to phenotype              | splicing outlier                        |
| s63                | CGS         | Case     | M      |     | 4   | Multiple Congenital Anomalies   |     | 8.5         | 151              | 358 exome    |                                                                         |                                            | -                                       |
| 38 s64             | CGS         | Control  | F      |     | 32  | NA                              |     | 8.3         | 151              | 343 none     | no strong candidates                                                    | candidate not directly linked to phenotype | splicing outlier                        |
| s65                | CGS         | Case     | M      |     | 13  | Neurology                       |     | 8.3         | 151              | 370 exome    |                                                                         |                                            | -                                       |
| s66                | CGS         | Control  | F      |     | 28  | NA                              |     | 7.8         | 151              | 352 none     |                                                                         |                                            | -                                       |
| 39 s67             | CGS         | Control  | M      |     | 38  | NA                              |     | 8.6         | 151              | 353 none     | no strong candidates                                                    | candidate not directly linked to phenotype | splicing outlier                        |
| s68                | UDN         | Case     | M      |     | 2   | Neurology                       |     | 9.3         | 151              | 384 genome   |                                                                         |                                            | -                                       |
| 40 s69             | UDN         | Control  | F      |     | 34  | NA                              |     | 9.2         | 151              | 389 genome   | candidates                                                              | candidate not directly linked to phenotype | splicing outlier                        |
| 41 s70             | UDN         | Case     | F      |     | 32  | Rheumatology                    | NA  |             | 151              | 349 exome    | candidates                                                              | candidate not directly linked to phenotype | splicing outlier                        |
| s71                | UDN         | Case     | F      |     | 8   | Neurology                       |     | 9.3         | 151              | 385 exome    |                                                                         |                                            | -                                       |
| s72                | UDN         | Control  | F      |     | 36  | NA                              |     | 9.2         | 151              | 375 exome    |                                                                         |                                            | -                                       |
| 42 s73             | UDN         | Control  | M      |     | 41  | NA                              |     | 9.2         | 151              | 374 exome    | candidates                                                              | candidate linked to phenotype              | splicing outlier                        |
| 43 s74             | UDN         | Case     | F      |     | 23  | Musculoskeletal and orthopedics |     | 9.1         | 151              | 385 genome   | candidates                                                              | no                                         | -                                       |
| s75                | UDN         | Case     | M      |     | 20  | Neurology                       |     | 9.1         | 151              | 369 genome   |                                                                         |                                            | -                                       |
| s76                | UDN         | Control  | F      |     | 43  | NA                              |     | 9.2         | 151              | 398 genome   |                                                                         |                                            | -                                       |
| s77                | UDN         | Control  | M      |     | 52  | NA                              |     | 9.4         | 151              | 381 genome   |                                                                         |                                            | -                                       |
| 44 s78             | UDN         | Control  | F      |     | 21  | NA                              |     | 9.1         | 151              | 373 genome   | candidates                                                              | candidate linked to phenotype              | splicing outlier                        |
| 45 s79             | UDN         | Case     | F      |     | 51  | Rheumatology                    |     | 8.9         | 151              | 372 exome    | candidates                                                              | no                                         | -                                       |
| s80                | UDN         | Case     | M      |     | 1   | Nephrology                      |     | 9.4         | 151              | 385 exome    |                                                                         |                                            | -                                       |
| s81                | UDN         | Control  | F      |     | 33  | NA                              |     | 8.9         | 151              | 359 exome    |                                                                         |                                            | -                                       |
| 46 s82             | UDN         | Control  | M      |     | 35  | NA                              |     | 8.9         | 151              | 376 exome    | candidates                                                              | candidate linked to phenotype              | splicing outlier                        |
| s83                | UDN         | Control  | M      |     | 39  | NA                              |     | 9           | 151              | 373 exome    |                                                                         |                                            | -                                       |
| s84                | UDN         | Case     | F      |     | 7   | Neurology                       |     | 9.4         | 151              | 372 exome    |                                                                         |                                            | -                                       |
| 47 s85             | UDN         | Control  | F      |     | 37  | NA                              |     | 9.4         | 151              | 375 exome    | candidates                                                              | no                                         | -                                       |
| s86                | UDN         | Control  | F      |     | 47  | NA                              |     | 8.4         | 151              | 361 exome    |                                                                         |                                            | -                                       |
| other controls s87 | UDN         | Control  | M      |     | 49  | NA                              |     | 8.9         | 151              | 377 exome    |                                                                         |                                            | -                                       |
